1 **Shared characteristics underpinning C<sub>4</sub> leaf maturation derived from analysis of multiple C<sub>3</sub>**  
2 **and C<sub>4</sub> species of *Flaveria***

3

4 Britta M.C. Kümpers\*<sup>1</sup>, Steven J. Burgess\*, Ivan Reyna-Llorens, Richard Smith-Unna, Chris  
5 Bournnell, and Julian M. Hibberd

6

7 Department of Plant Sciences, Downing Street, University of Cambridge, Cambridge CB2 3EA, UK

8

9 BMCK – Britta.Kuempers@nottingham.ac.uk

10 SJB - sjb287@cam.ac.uk

11 I-RL - suallorems@gmail.com

12 RS-U - rds45@cam.ac.uk

13 CB - cmb211@cam.ac.uk

14 JMH (corresponding) - jmh65@cam.ac.uk. Tel - 44(0) 1223 766547

15

16 \* These authors contributed equally to this manuscript

17 <sup>1</sup>Current address: Centre for Plant Integrative Biology, School of Biosciences, University of  
18 Nottingham, Loughborough LE12 5RD, United Kingdom

19

20 Number of pages: 26

21 Number of Figures: 9

22 Number of Colour Figures: 5

23 Word Count: 4987

24 Number of Supplementary Figures: 7

25 Number of Supplementary Tables: 2

26

27

28 Highlight: We identify transcription factors that show conserved patterns of expression in multiple  
29 C<sub>4</sub> species, both within the *Flaveria* genus, but also in more distantly related C<sub>4</sub> plants.

30 **Abstract**

31 Most terrestrial plants use C<sub>3</sub> photosynthesis to fix carbon. In multiple plant lineages a modified  
32 system known as C<sub>4</sub> photosynthesis has evolved. To better understand the molecular patterns  
33 associated with induction of C<sub>4</sub> photosynthesis the genus *Flaveria* that contains C<sub>3</sub> and C<sub>4</sub> species  
34 was used. A base to tip maturation gradient of leaf anatomy was defined, and RNA sequencing  
35 was undertaken along this gradient for two C<sub>3</sub> and two C<sub>4</sub> *Flaveria* species. Key C<sub>4</sub> traits including  
36 vein density, mesophyll and bundle sheath cross-sectional area, chloroplast ultrastructure, and  
37 abundance of transcripts encoding proteins of C<sub>4</sub> photosynthesis were quantified. Candidate genes  
38 underlying each of these C<sub>4</sub> characteristics were identified. Principal Components Analysis  
39 indicated that leaf maturation and then photosynthetic pathway were responsible for the greatest  
40 amount of variation in transcript abundance. Photosynthesis genes were over-represented for a  
41 prolonged period in the C<sub>4</sub> species. Through comparison with publically available datasets we  
42 identify a small number of transcriptional regulators that have been up-regulated in diverse C<sub>4</sub>  
43 species. The analysis identifies similar patterns of expression in independent C<sub>4</sub> lineages and so  
44 indicates that the complex C<sub>4</sub> pathway is associated with parallel as well as convergent evolution.

45

46

47

48

49

50

51

52

53

54 **Keywords:** C<sub>4</sub> photosynthesis, C<sub>4</sub> leaf anatomy, parallel evolution, convergent evolution, gene  
55 expression, RNA-SEQ, *Flaveria*

## 56 Introduction

57 Photosynthesis powers life on earth by harvesting energy from sunlight to fix carbon dioxide. In  
58 seed plants three types of photosynthesis known as C<sub>3</sub>, C<sub>4</sub> and Crassulacean Acid Metabolism  
59 (CAM) have been defined. C<sub>3</sub> photosynthesis is considered the ancestral form and is found in the  
60 majority of species. All three photosynthetic pathways use Ribulose-1,5-Bisphosphate Carboxylase  
61 Oxygenase (RuBisCO) to catalyse CO<sub>2</sub> fixation in the Calvin-Benson-Bassham (CBB) cycle, and in  
62 so doing, two molecules of the three-carbon molecule 3-phosphoglycerate are formed. However,  
63 RuBisCO is not completely substrate specific, catalysing an oxygenation reaction that produces 2-  
64 phosphoglycolate as well as 3-phosphoglycerate (Bowes *et al.*, 1971). As phosphoglycolate is  
65 toxic and removes carbon from the CBB cycle, it is rapidly metabolised by the photorespiratory  
66 pathway to ensure it does not accumulate, but also to retrieve carbon. Photorespiration uses  
67 energy inputs and is not completely effective in terms of carbon retrieval so some CO<sub>2</sub> is lost  
68 (Bauwe *et al.*, 2010). The rate of oxygenation at the active site of RuBisCO increases with  
69 temperature, and so in lower latitudes, multiple plants lineages have evolved either CAM or C<sub>4</sub>  
70 photosynthesis, which in both cases, initially fix CO<sub>2</sub> by an alternate carboxylase, and then  
71 subsequently release high concentrations of CO<sub>2</sub> around RuBisCO to limit oxygenation.

72 Almost all C<sub>4</sub> plants use a two-celled system in which Phospho~~eno~~pyruvate Carboxylase  
73 (PEPC) initially fixes carbon in Mesophyll (M) cells, and then after release of CO<sub>2</sub> in the Bundle  
74 Sheath (BS) cells, RuBisCO re-fixes CO<sub>2</sub> in the CBB cycle. The production of CO<sub>2</sub> within the BS  
75 leads to high concentrations of CO<sub>2</sub> around RuBisCO and minimises oxygenation. PEPC  
76 generates oxaloacetate, which is rapidly metabolised to malate and/or aspartate prior to their  
77 diffusion to the BS. Three C<sub>4</sub> acid decarboxylases enzymes known as NADP-malic enzyme  
78 (NADP-ME), NAD-malic enzyme (NAD-ME) and Phospho~~eno~~pyruvate Carboxykinase (PEPCK)  
79 have been shown to release CO<sub>2</sub> around RuBisCO, and for many years, based on their relative  
80 abundance, these decarboxylase enzymes were used to define three C<sub>4</sub> biochemical subtypes.  
81 More recently it has been shown that this division into three types is less rigid than previously  
82 (Furbank, 2011; Bellasio and Griffiths, 2014; Wang *et al.*, 2014). The variation in the activity of  
83 these three decarboxylases indicates that C<sub>4</sub> photosynthesis is underpinned by convergent  
84 evolution in different lineages of plants. Within the more than sixty groups of plants known to use

85 the C<sub>4</sub> pathway, there are some genera containing both C<sub>3</sub> and C<sub>4</sub> species (Sage *et al.*, 2011).  
86 Probably, the most studied of these clades with closely related C<sub>3</sub> and C<sub>4</sub> species is the genus  
87 *Flaveria* found in the Asteraceae (Drincovich *et al.*, 1998; Gowik *et al.*, 2011; Schulze *et al.*, 2013).

88 Most species of *Flaveria* are native to Central and North America and grow as annual or  
89 perennial herbs or shrubs with decussate leaves (Powell, 1978). C<sub>4</sub> species of *Flaveria* show high  
90 activities of the NADP-ME C<sub>4</sub> acid decarboxylase in chloroplasts of the BS, and leaf anatomy  
91 conforms to the Atriplicoid type (McKown and Dengler, 2007). Phylogenetic reconstruction of this  
92 group has been conducted using morphological as well as life history and gene sequence data for  
93 21 of the 23 known species (McKown *et al.*, 2005; Lyu *et al.*, 2015). The consensus from this work  
94 is that the ancestral condition in *Flaveria* is C<sub>3</sub> photosynthesis (McKown *et al.*, 2005; Lyu *et al.*,  
95 2015) and that the occurrence of multiple C<sub>3</sub> and C<sub>4</sub> species within the same genus provides an  
96 interesting system to study processes associated with the C<sub>4</sub> phenotype.

97 In this study, we used two pairs of C<sub>3</sub> and C<sub>4</sub> *Flaveria* species, and set out to link the gradual  
98 maturation of C<sub>3</sub> and C<sub>4</sub> characteristics in leaves to underlying alterations in transcript abundance.  
99 By linking the development of the C<sub>4</sub> phenotype to changes in gene expression in two C<sub>4</sub> species,  
100 and comparing these findings with equivalent data from two C<sub>3</sub> species in the same genus, we  
101 aimed to identify common traits associated with C<sub>4</sub> photosynthesis, and to remove species-specific  
102 characteristics from our datasets. Using the maturing leaf as a dynamic system we show that in  
103 both C<sub>4</sub> species studied, the induction of Kranz anatomy occurs along a base to tip developmental  
104 gradient in leaves under 2cm length. We sampled this maturation gradient and undertook RNA  
105 sequencing to correlate the underlying patterns of gene expression with anatomical development.

## 106 **Materials & Methods**

### 107 **Plant growth**

108 *Flaveria bidentis* (L.) Kuntze, *Flaveria pringlei* Gandoger, *Flaveria robusta* Rose, and *Flaveria*  
109 *trinervia* (Spreng.) C. Mohr were grown in a glasshouse on the roof of the Department of Plant  
110 Sciences, Cambridge. Temperature was maintained above 20°C and supplemental lighting  
111 provided to ensure at least 250-350  $\mu\text{mol m}^{-2} \text{s}^{-1}$  photon flux density for 16 hours per day. Seeds  
112 were sown directly onto soil (Levington's M3 potting compost; Scotts Miracle-Gro Company,  
113 Godalming, UK) in covered pots as seeds need high humidity for germination. Covers were  
114 removed when seedlings were 1 cm high.

115

### 116 **Analysis of leaf anatomy**

117 Samples of 4 mm<sup>2</sup> to 1 cm<sup>2</sup> were fixed in 4% (w/v) formaldehyde at 4°C overnight and then  
118 placed on ice and dehydrated prior to being placed in 100% (v/v) ethanol, followed by 1:1  
119 ethanol/Technovit mix and then 100% Technovit 7100 (Heraeus Kulzer, Germany). Samples were  
120 subsequently left in Technovit solution plus hardener I (1g hardener per 100ml) for at least an  
121 hour. Disposable plastic resin embedding moulds (Agar Scientific, UK) were filled with a mixture of  
122 Technovit plus hardener I and II (15 ml of Technovit plus hardener I were mixed with 1 ml of  
123 hardener II). Samples were arranged within the embedding moulds which were then covered with  
124 unstretched Parafilm® M to seal them from air, and left to harden overnight. Samples were  
125 removed, heated to 80°C and trimmed for sectioning. Sections of 2 $\mu\text{m}$  thickness were produced  
126 using a Thermo Scientific Microm HM340E microtome. Ribbons were mounted onto  
127 SuperFrost®white microscope slides (VWR, Leuven, NL), left to dry and then stained with 0.1%  
128 (w/v) toluidine blue. All sections were analysed with a BX41 light microscope (Olympus, Center  
129 Valley, PA, USA), usually using the bright-field setting.

130 To clear leaves, they were placed into 70% (v/v) ethanol and heated to 80°C. The next day  
131 samples were placed in 5% (w/v) NaOH for about 15 minutes to clear leaves further and then  
132 mounted in water and analysed by light microscopy.

133 To quantify leaf anatomical characteristics, Photoshop CS5 was used. The programme was  
134 calibrated with scale bars and the lasso tool was used to measure cell area for both BS and M

135 cells. Measurements of M cells were taken between BS cells, with 30 BS and 30 M cells being  
136 measured per leaf section. This was done for all six leaf stages and for three biological replicates  
137 for each species. Images derived from leaf sections were assembled using Photoshop. The  
138 background of sections was averaged and in some cases the contrast was increased to improve  
139 visibility of cell borders. Vein density was determined using images of cleared leaves. In mature  
140 sections of the leaf there was no ambiguity in collecting these data, whereas in the most basal  
141 sections of some leaves, the estimates may be underestimates of the extent of venation as  
142 immature veins are not always visible. Three independent leaves were measured per species. The  
143 length of the veins was measured using Q-Capture Pro7 and vein density was expressed in mm  
144 mm<sup>-2</sup>.

145 Samples for the Transmission Electron Microscope (TEM) were processed by the Multi-Imaging  
146 Centre in the Department of Physiology, Development and Neuroscience (Cambridge). Sections of  
147 about 1 mm thickness of all six stages along a developing leaf were used for embedding. Tissues  
148 were fixed in in 4% (w/v) glutaraldehyde in 0.1 M HEPES buffer with a pH of 7.4 for 12 hours at  
149 4°C. Subsequently they were rinsed in 0.1 M HEPES buffer five times, and then treated with 1%  
150 osmium ferricyanide at room temperature for two hours and rinsed in deionised water five times  
151 before being treated with 2% (w/v) uranyl acetate in 0.05 M maleate buffer with a pH of 5.5 for two  
152 hours at room temperature. They were rinsed again in deionised water and dehydrated in an  
153 ascending series of ethanol solutions from 70% to 100% (v/v). This was followed by treatment with  
154 two changes of dry acetonitrile and infiltration with Quetol 651 epoxy resin. 50-70 nm thick sections  
155 were cut with a Leica Ultracut UCT and stained with lead citrate and uranyl acetate. Images were  
156 taken with a Tecnai G2 TEM (FEI, Hillsboro, USA) and operated at 120Kv using an AMT XR60B  
157 digital camera (Advanced Microscopy Techniques, Woburn, USA) running Deben software (Deben  
158 UK Limited, Bury St. Edmunds, UK). Images were taken at 1700x, 3500x and 5000x magnification.

159

## 160 **RNA extraction and sequencing**

161 Deep sequencing was carried out to analyse transcriptomes associated with the leaf  
162 developmental gradient defined by the anatomical analysis. Opposite leaves from the third leaf pair  
163 after the cotyledons were harvested in the morning between 10 am and 11am (four hours after the

164 start of the photoperiod in the glasshouse). The leaves were harvested when they had reached  
165 1.8-2 cm length (from base to tip). Leaves were measured on an ice-cold glass plate and cut into  
166 six portions of equal length (3-3.3 mm). Each sample was then immediately placed into liquid  
167 nitrogen. Sections of twelve leaves were collected before extraction of RNA using the Qiagen Plant  
168 RNeasy Mini Kit. The optional DNA digestion step with RNase-free DNase was performed. Three  
169 biological replicates were analysed for each of the four *Flaveria* species. Total leaf RNA was sent  
170 to the Genomics & Transcriptomics Laboratory (GTL) in Düsseldorf (Germany) for paired-end  
171 sequencing. RNA samples were prepared following the TrueSeq RNA sample preparation v2 guide  
172 (Revision F) and sequenced using an Illumina/Solexa HiSeq 2000 machine. *De-novo* assembly  
173 was undertaken following previously published methods (Aubry *et al.*, 2014; Smith-Unna *et al.*,  
174 2016). For Principal Components Analysis Z-scores were calculated from Transcripts per Million  
175 (TPM) reads from for each gene across the four species. Expression patterns of genes of interest  
176 were analysed using a custom-made R script to extract the data of interest and to visualise  
177 expression patterns. GO term analysis was performed according to (Burgess *et al.*, 2016).

## 178 **Results and Discussion**

### 179 **Leaf maturation in C<sub>3</sub> and C<sub>4</sub> *Flaveria* species**

180 We first confirmed that fully expanded mature leaves of C<sub>3</sub> *F. pringlei* and *F. robusta* as well as  
181 C<sub>4</sub> *F. bidentis* and *F. trinervia* showed characteristic C<sub>3</sub> and C<sub>4</sub> anatomy under our growth  
182 conditions. In all cases the third leaf pair was chosen as the first and second leaf pairs have  
183 previously been described as juvenile (McKown and Dengler, 2009). Mature third leaves of C<sub>3</sub> and  
184 C<sub>4</sub> *Flaveria* ranged from 6-10 cm in length, but the C<sub>3</sub> species had narrower leaves with an entire  
185 margin whereas the C<sub>4</sub> leaves were wider and the margin was slightly dentate (Figure 1A). Both C<sub>4</sub>  
186 species had closer veins than the C<sub>3</sub> species (Figure 1B, Supplementary Figure 1). In addition,  
187 analysis of transverse leaf sections indicated that C<sub>3</sub> leaves were thicker because of larger cells  
188 and more cell layers (Figure 1C). Clear differences in BS and M cell arrangement were visible  
189 between the C<sub>3</sub> and C<sub>4</sub> pairs with the BS in both C<sub>4</sub> species being more uniform in shape than in  
190 the C<sub>3</sub> species (Figure 1C). In addition, compared with the C<sub>3</sub> species, M cells in the C<sub>4</sub> leaves  
191 were smaller (Supplementary Figure 1) and showed increased contact with the BS. In agreement  
192 with previous analysis (McKown and Dengler, 2007), leaves of the two C<sub>4</sub> and two C<sub>3</sub> species  
193 typically contained five and eight ground cell layers between the adaxial and abaxial epidermis  
194 respectively.

195 In all four *Flaveria* species, leaves of 1.8-2cm length showed a basipetal maturation gradient  
196 with differentiating tissues at the base and fully differentiated tissues at the tip (Figure 2A-C and  
197 Supplementary Figure 2). This base-to-tip maturation programme is typical of dicotyledons, but it is  
198 notable that in *Flaveria* maturation occurred in larger leaves than in *G. gynandra*, where the  
199 maturation gradient was detected in leaflets of 0.4 cm length (Aubry *et al.*, 2014). This prolonged  
200 development of leaf maturation in *Flaveria* thus provides an excellent system to analyse the  
201 induction of C<sub>4</sub> photosynthesis as the larger leaf allows these leaves to be divided into more stages  
202 for functional analysis.

203 To better understand differences in leaf maturation in C<sub>3</sub> and C<sub>4</sub> *Flaveria*, leaves from each  
204 species were divided into six portions, RNA was extracted, quantified and integrity determined  
205 (Supplementary Figure 3) and then subjected to deep sequencing. On average 20 million reads  
206 were recovered from each replicate (Supplementary Table 1). After *de novo* assembly of these



207 reads, the average number of annotated transcripts per species was 12,475 (Supplementary Table  
208 1).

209 Read mapping was used to quantify transcript abundance in Transcripts Per Million (TPM,  
210 Supplementary Data 1). By grouping the two base, mid and tip stages, it was possible to quickly  
211 analyse transcript behaviour across the maturation gradient. This revealed that on average 40% of  
212 annotated transcripts showed descending behaviours, meaning that they were expressed more  
213 strongly at the base of the leaf than at the tip (Supplementary Table 1). Using the 8000 annotations  
214 found in all four species, correlation analysis showed that patterns of gene expression first  
215 clustered by species and then by photosynthetic type, meaning that the correlation between  
216 neighbouring developmental stages was highest within species and that the correlation was higher  
217 between species of the same photosynthetic type than between species of different photosynthetic  
218 types (Supplementary Figure 4). A gradient from base to tip was clear in all four species but was  
219 more pronounced in the two C<sub>4</sub> species (Supplementary Figure 4).

220 The six portions from the base to the tip of the leaf showed a clear induction of genes known to  
221 encode components of the C<sub>4</sub> cycle (Figure 3). Around 200 genes are consistently up-regulated in  
222 the upper tip tissue using C<sub>4</sub> compared with C<sub>3</sub> photosynthesis (Figure 4A, Supplementary Data 2),  
223 and in young tissue that is still undergoing differentiation, the number of genes up-regulated in the  
224 C<sub>4</sub> species is around double this number. These estimates are significantly lower than those  
225 reported from analysis of whole leaves at various developmental stages from C<sub>3</sub> *Tarenaya*  
226 *hassleriana* and C<sub>4</sub> *Gynandropsis gynandra* in the Cleomaceae (Külahoglu *et al.*, 2014), where  
227 between 2500 and 3500 genes were estimated to be upregulated in the C<sub>4</sub> species. This reduction  
228 in differential gene expression in the C<sub>4</sub> compared with C<sub>3</sub> *Flaverias* in this study compared with  
229 the estimates from the Cleomaceae may be due to the use of two C<sub>3</sub> and two C<sub>4</sub> species removing  
230 species-specific differences, but also to the reduced phylogenetic distance between the *Flaveria*  
231 species. Principal Components Analysis indicated that the first two dimensions contributed to 37  
232 and 19% of the variation respectively, and that whereas the first dimension was associated with  
233 the leaf maturation signal from all species, the second dimension was associated with the  
234 photosynthetic pathway being used (Figure 4B). This finding implies that C<sub>4</sub> metabolism has a  
235 large impact on the differences in gene expression associated with C<sub>3</sub> and C<sub>4</sub> leaves within one

236 genus. When MapMan categories associated with the top decile of differentially expressed genes  
237 were assessed it was notable that photosynthesis genes were over-represented for a prolonged  
238 period along the gradient in the C<sub>4</sub> species (Figure 4C). This was also the case for genes related to  
239 DNA and transport. In contrast, the MapMan category associated with RNA was over-represented  
240 for longer in the C<sub>3</sub> species (Figure 4C). Equivalent analysis for Gene Ontology (GO) terms  
241 indicated that cell wall loosening was over-represented for longer in both C<sub>4</sub> compared with the C<sub>3</sub>  
242 species (Supplementary Figure 5). Overall, these data indicate that the maturation of *Flaveria*  
243 leaves captures changes in transcript abundance associated with induction of C<sub>3</sub> or C<sub>4</sub>  
244 photosynthesis, and provide insight into the broader alterations in gene expression. We next aimed  
245 to relate the underlying anatomical changes associated with leaf maturation in these C<sub>3</sub> and C<sub>4</sub>  
246 species of *Flaveria* to changes in gene expression determined from the deep sequencing.

247

#### 248 **Kranz anatomy during leaf maturation**

249 Using cleared leaves, veins were traced to visualise their development. In the most basal part of  
250 the leaf, major veins were present but in the two C<sub>4</sub> species, the highest order veins were still  
251 being laid down. Some of these developing higher order veins could be detected by the specific  
252 patterns of periclinal cell divisions associated with their production (Supplementary Figure 6). Vein  
253 density was determined in each of the six sections along the leaf developmental gradient, and this  
254 showed markedly different developmental patterns in the C<sub>3</sub> and C<sub>4</sub> pairs of *Flaveria*. (Figure 5A).  
255 Vein density was lower at the base in C<sub>4</sub> compared with C<sub>3</sub> leaves of *Flaveria*, but during the  
256 transition from the base to the middle of the leaf density increased dramatically in the C<sub>4</sub> species  
257 (Figure 5B). In both C<sub>3</sub> and C<sub>4</sub> pairs, vein density then decreased from the middle to the tip of the  
258 leaf. The reduction in vein density as leaves matured is likely associated with expansion of M and  
259 BS cells. In the two most basal sections of the leaf cell division was still ongoing and procambial  
260 strands were initiated first with a periclinal and then an anticlinal division, to derive BS cells  
261 (Supplementary Figure 6). These basal portions of the leaf therefore appear most interesting to  
262 interrogate for candidate genes associated with these processes. The *de novo* assembled  
263 transcriptomes from the four *Flaveria* species were therefore analysed for homologues of genes  
264 known to impact on vein formation in others species.

265 Six genes that effect vein formation in *A. thaliana* showed different behaviours in the C<sub>4</sub>  
266 *Flaverias* compared with the C<sub>3</sub> species (Figure 6). In all cases absolute transcript abundance  
267 tended to be higher at the base of the C<sub>4</sub> leaves compared with the base of the C<sub>3</sub> species.  
268 However, the most consistent differences in expression were found for *Arabidopsis thaliana*  
269 *HOMEBOX-GENE-8 (ATHB8)*. *SHR* and *SCR* have been implicated with the development of C<sub>4</sub>  
270 Kranz anatomy (Slewinski *et al.*, 2012; Slewinski, 2013). *SHR* was detected in three of the species  
271 with a descending pattern but no clear difference between C<sub>3</sub> and C<sub>4</sub>. *SCR* also showed a  
272 descending pattern but again with no clear difference between photosynthetic types. Of  
273 Scarecrow-like genes, only *SCARECROW-LIKE 14* was clearly higher in C<sub>4</sub> and showed a  
274 parabolic expression pattern, being most highly expressed at the base and the tip (Supplementary  
275 Data 3). Transcripts encoding the auxin response factors ARF3, ARF8 and also IAA7 showed  
276 differences in the timing of expression in C<sub>4</sub> compared with C<sub>3</sub> species (Supplementary Data 3).

277 The same six regions from leaf base to tip used to define vein density were next used to  
278 quantify maturation of BS and M cells (Figure 7). Leaf thickness was higher in the C<sub>3</sub> compared  
279 with the C<sub>4</sub> species, and leaf expansion continued for longer in the C<sub>3</sub> leaves (Figure 7A). The BS  
280 in the C<sub>3</sub> species was less regular than in the C<sub>4</sub> species, and individual cell size within the BS was  
281 more variable (Figure 7A). However, it was notable that the cross-sectional area of BS cells in the  
282 C<sub>3</sub> species was larger than that of C<sub>4</sub> species, particularly towards the tip. It has been proposed  
283 that a large BS cell size is a key early event associated with the evolution of C<sub>4</sub> photosynthesis  
284 (Williams *et al.*, 2013; Christin *et al.*, 2013; Griffiths *et al.*, 2013), and so it appears that within  
285 *Flaveria* this is a pre-existing trait. It was noticeable that the cross-sectional area of M cells from  
286 the two C<sub>3</sub> species was around five times greater than M cells of the C<sub>4</sub> species (Figure 7B). This  
287 strongly implies that compared with C<sub>3</sub> species, the reduced leaf depth of C<sub>4</sub> species is associated  
288 with an inhibition of M cell expansion as well as a reduced number of cell layers. A number of  
289 genes that have been annotated as having roles in cell proliferation or expansion showed  
290 behaviours that may explain the reduced cell expansion in leaves of both C<sub>4</sub> species. Most notable  
291 was *DWF4*, a 22 $\alpha$ -hydroxylase that catalyses the rate-limiting step of Brassinosteroid synthesis  
292 and so controls cell expansion. In both C<sub>3</sub> species, *DWF4* transcript abundance increased along  
293 the leaf gradient but in the C<sub>4</sub> species its transcripts were barely detectable (Supplementary Data

294 4). These data imply that *DWF4* is a strong candidate for the reduced expansion associated with  
295 maturation of the C<sub>4</sub> leaf.

296 A prolonged rate of cell division in the C<sub>4</sub> *Flaveria* species is also supported by transcript  
297 profiles. A number of genes implicated in cell division are higher in basal sections of C<sub>4</sub> than C<sub>3</sub>  
298 leaves including *PLE* (Müller *et al.*, 2004), *MOR1* (Whittington *et al.*, 2001), *ATK1* (Marcus *et al.*,  
299 2003) and *ATK3* (Mitsui *et al.*, 1994) which are involved in microtubule organisation, and *SCC3*  
300 (Chelysheva *et al.*, 2005) and *SYN1* (Cai *et al.*, 2003) which are implicated in sister chromatid  
301 pairing (Supplementary Data 4). Transcripts derived from genes associated with DNA replication  
302 and repair including *SOG1* (Yoshiyama *et al.*, 2009), *TOP6B* (Gilkerson and Callis, 2014), *MutS*  
303 homologs *MSH* (*MSH3*, *MSH4*, *MSH7*) (Culligan and Hays, 2000) and multiple components of the  
304 Mini-chromosome maintenance (MCM) complex (*MCM2*, *MCM3*, *MCM5*, *MCM6*) (Tuteja *et al.*,  
305 2011) were also more abundant in the C<sub>4</sub> species at the base of the leaf (Supplementary Data 4).  
306 Good candidate regulators of cell division include MYB3R4 which forms a complex with E2FB and  
307 *RETINOBLASTOMA-RELATED PROTEIN* (RBR1) to activate cell-cycle progression (Haga *et al.*,  
308 2011), and *DEL1* which maintains cell division by repressing entry into the endocycle (Vlieghe *et*  
309 *al.*, 2005), both of which are higher in the base of C<sub>4</sub> leaves and maintain expression longer into  
310 the leaf gradient.

311 A reduction along the leaf gradient in the abundance of transcripts encoding CPP SYNTHASE 1  
312 (CPS1), which catalyses the first step of gibberellin synthesis, and a spike in transcripts of *GA2ox2*  
313 (Supplementary Data 4), which degrades gibberellin, between upper base and lower mid in C<sub>4</sub>  
314 leaves, is in keeping with findings that a decrease in GA levels controls the transition between cell  
315 division and expansion in Maize (Nelissen *et al.*, 2012). A corresponding pattern cannot be seen in  
316 C<sub>3</sub> leaves, which may mean that the transition between cell division had already occurred at the  
317 base of C<sub>3</sub> lineages, or is mediated by another mechanism.

318

### 319 **Chloroplast maturation within the leaf gradient**

320 Species that primarily use NADP-ME to decarboxylate malate in the C<sub>4</sub> BS commonly develop  
321 dimorphic chloroplasts with M cells containing stacked thylakoids (grana) and the BS cells  
322 containing fewer grana (Edwards and Walker, 1983; Edwards and Voznesenskaya, 2011). To

323 provide insight into the dynamics of chloroplast development and maturation in  $C_3$  and  $C_4$  *Flaveria*  
324 species, transmission electron microscopy was used to investigate chloroplast structure in each of  
325 the six stages along the leaf gradient. Dimorphic chloroplasts were observed in the  $C_4$  species but  
326 not in the  $C_3$  species (Figure 8A-D). Towards the base of the  $C_4$  leaves, both BS and M  
327 chloroplasts contained 2-3 granal lamellae per stack (Supplementary Figure 7). In more mature  
328 parts of the leaf levels of stacking were reduced in BS cells but increased in M cells (Figure 8A-D).  
329 In both  $C_3$  species, a developmental gradient in granal stacking was also visible from base to tip,  
330 with more mature parts of the leaf showing increased levels of granal stacking in both cell types  
331 (Supplementary Figure 7). Thus, a key difference between the  $C_3$  and  $C_4$  leaves was the reduction  
332 in granal stacking in  $C_4$  BS cells from the middle of the leaf.

333 The control of photosynthesis gene expression and chloroplast development has previously  
334 been linked to a pair of transcription factors known as GOLDEN-LIKE 1 and 2 (GLK1 and GLK2)  
335 (Supplementary Data 5). Unfortunately, *de novo* assembly did not generate a complete set of  
336 contigs for either GLK1 or GLK2 from all four species so we were unable to determine if their  
337 abundance correlated with the observed changes in chloroplast development. However, other  
338 candidate genes that can be associated with chloroplast maturation were identified. For example,  
339 cytokinin is known to play a role in chloroplast maturation, and increased abundance of transcripts  
340 encoding the cytokinin receptors AHK2 and AHK3, along with the downstream effector ARR1 in  $C_4$   
341 species suggests that enhanced cytokinin signalling may play a role in these alterations to the  $C_4$   
342 chloroplast. Additionally, it was also notable that the behaviour of two nuclear encoded chloroplast  
343 RNA polymerases (RpoTp and RpoTmp) (Swiatecka-Hagenbruch *et al.*, 2008) showed clear  
344 differences between the  $C_3$  and  $C_4$  *Flaveria* species. Transcripts encoding RpoTp, which controls  
345 *ycf1* that is involved in plastid protein import were very low in both  $C_4$  species. Further indications  
346 to changes in chloroplast protein import related to components of the TIC/TOC (Supplementary  
347 Data 5). Transcripts encoding the outer envelope receptor proteins TOC34 and TOC159 were  
348 higher in the base and peaked later in the  $C_4$  than the  $C_3$  species. Additionally, TOC75, the major  
349 channel constituent for protein import into the chloroplast (Li and Chiu, 2010) was lower at the  
350 base of  $C_4$  leaves. These data would be consistent with protein import playing a role in the  
351 establishment of dimorphic chloroplasts. Chloroplast maturation also correlated with increased

352 abundance of nuclear-encoded chloroplast sigma factors, which direct the nuclear-encoded  
353 chloroplast RNA polymerase (NEP) to promoters.

354 Previous studies have demonstrated that C<sub>4</sub> plants alter Photosystem activity to adjust  
355 ADP/ATP and NADPH ratios to ensure proper functioning of the carbon pump. Consistent with this  
356 was the C<sub>4</sub> specific up-regulation of SIG3, which initiates transcription of *psbN* (Zghidi *et al.*, 2007)  
357 which is involved in repair of PSII complexes (Torabi *et al.*, 2014). It was also notable that  
358 transcripts encoding components of the NDH complex (*NDF1*, *NDF6* and *PIFI*), as well as genes  
359 involved in cyclic electron transport (*PGR5* and *PGRL1A*) were more abundant in both C<sub>4</sub> species,  
360 and these differences became more apparent from base to tip (Supplementary Data 5).  
361 Chloroplast dimorphism also coincided with an increase in transcript abundance of *CRR1*, which is  
362 proposed to be involved in NDH complex assembly.

363 Analysis of electron micrographs also revealed that chloroplast length in the BS increased from  
364 base to tip in the C<sub>4</sub> species more than in the C<sub>3</sub> species (Figure 9). Two members of the  
365 *REDUCED CHLOROPLAST COVERAGE (REC)* gene family, REC2 and REC3, knockout of which  
366 causes a reduction in chloroplast size (Larkin *et al.*, 2016) were up-regulated in the C<sub>4</sub> species.  
367 Further, *FtsZ1-1* which is involved in chloroplast division, was significantly down-regulated in the  
368 C<sub>4</sub> compared with the C<sub>3</sub> species (Supplementary Data 5). As reduced division of chloroplasts  
369 leads to increased size (Pyke and Leech, 1994; Pyke, 1997) the reduced expression of chloroplast  
370 division genes in C<sub>4</sub> plants could lead to their increased size in BS cells.

371

### 372 **Convergence in transcript abundance between independent C<sub>4</sub> lineages**

373 By combining our data from the four *Flaveria* species with publically available datasets, we next  
374 sought to investigate whether separate lineages of C<sub>4</sub> plants shared common changes in transcript  
375 abundance compared with their C<sub>3</sub> congeners. A recent study compared transcriptomes derived  
376 from leaf developmental gradients of *Tarenaya hassleriana* (C<sub>3</sub>) and *Gynandropsis gynandra* (C<sub>4</sub>)  
377 from the Cleomaceae (Külahoglu *et al.*, 2014). In contrast to our work, whole leaves were staged  
378 by age (Külahoglu *et al.*, 2014) and changes in transcript abundance compared with non-  
379 photosynthetic tissues such as roots. This analysis identified a set of thirty-three genes that could  
380 be annotated with unique *A. thaliana* identifiers. This set of genes showed root expression in the

381 C<sub>3</sub> species *T. hassleriana* but leaf expression in the C<sub>4</sub> species *G. gynandra* (Külahoglu *et al.*,  
382 2014), and so it was proposed that these were key genes that neofunctionalise to become involved  
383 in C<sub>4</sub> photosynthesis. Of these thirty-three genes, homologues to fifteen were detected in all four  
384 *Flaveria* species, but only three showed up-regulation in the C<sub>4</sub> compared with C<sub>3</sub> species in our  
385 study and three showed higher expression in the two C<sub>3</sub> species (Supplementary Data 6).

386 Previously, transcript abundance in developing leaves of the C<sub>4</sub> dicot *Gynandropsis gynandra*  
387 (Aubry *et al.*, 2014) has been compared with the C<sub>4</sub> monocot maize (Li *et al.*, 2010; Pick *et al.*,  
388 2011). Despite the very wide phylogenetic distance between these species, eighteen transcription  
389 factors that showed the same patterns of behaviour in both C<sub>4</sub> *G. gynandra* and C<sub>4</sub> maize were  
390 identified (Aubry *et al.*, 2014). Ten of these eighteen candidates were also detected in all four  
391 *Flaveria* species. Five of those showed ascending behaviour and higher transcript abundance in  
392 the two C<sub>4</sub> species. These were RAD-LIKE6 (RL6, AT1G75250); AT2G05160, a CCCH-type zing  
393 finger family protein with RNA-binding domain; AT2G21530, a SMAD/FHA domain containing  
394 protein; RNA Polymerase Sigma Subunit C (SIGC, AT3G53920) and BEL1-Like Homeodomain1  
395 (BLH1, AT5G67030) (Supplementary Data 7). The five genes have therefore been shown to  
396 exhibit the same behaviour along leaf developmental gradients in C<sub>4</sub> species in the monocots and  
397 dicots (both rosids (Cleomaceae) and asterids (Asteraceae)). This strongly supports the notion that  
398 independent lineages of C<sub>4</sub> plant have recruited homologous *trans*-factors to induce the C<sub>4</sub> system.

## 399 **Summary and Conclusions**

400 Most previous analysis derived from comparisons of RNA-seq of C<sub>3</sub> and C<sub>4</sub> species have either  
401 relied on sampling one con-generic C<sub>3</sub> and C<sub>4</sub> species pair, or analysis of mature leaf tissues. The  
402 number of genes that are differentially expressed between any two species can be very high  
403 simply due to species-specific differences, which do not relate to their photosynthetic pathway. In  
404 this work we identify genes that are consistently differentially expressed in multiple C<sub>3</sub> and C<sub>4</sub>  
405 species from the same genus along a leaf maturation gradient. In the *Flaveria* genus, the dataset  
406 therefore indicates that ~200 genes are consistently up-regulated in mature tissue using C<sub>4</sub>  
407 compared with C<sub>3</sub> photosynthesis. In young tissue that is still undergoing differentiation, the  
408 number of genes up-regulated in the C<sub>4</sub> species is around double this number. Leaf maturation and  
409 then photosynthetic pathway were responsible for the greatest amount of variation in transcript  
410 abundance. Overall, the analysis therefore provides quantitation of changes in gene expression  
411 associated with C<sub>3</sub> and C<sub>4</sub> photosynthesis, candidate genes underlying the alterations in leaf  
412 characteristics associated with these pathways, and through comparison with independent C<sub>4</sub>  
413 lineages outside of the Asteraceae, insight into the extent to which parallel evolution underlies the  
414 convergent and complex C<sub>4</sub> trait.



415 **Supplementary Data**

416 **Supplementary Figure 1:** Mature leaf vein density and cell size.

417

418 **Supplementary Figure 2:** Leaf anatomy maturation gradient in C<sub>3</sub> and C<sub>4</sub> *Flaveria*.

419

420 **Supplementary Figure 3:** RNA quality from sections of each species.

421

422 **Supplementary Figure 4:** TPM correlation matrix.

423

424 **Supplementary Figure 5:** GO term analysis presented as heatmaps for each *Flaveria* species.

425

426 **Supplementary Figure 6:** Cell division and vein development in the base samples of *Flaveria*.

427

428 **Supplementary Figure 7:** Chloroplast maturation in mesophyll and bundle sheath cells for each  
429 species.

430

431 **Supplementary Data 1:** TPM values for all four species for all stages and all replicates.

432

433 **Supplementary Data 2:** Summary of transcripts that were upregulated in both C<sub>3</sub> species or both  
434 C<sub>4</sub> species at each stage.

435

436 **Supplementary Data 3:** Transcript abundance of *SHR*, *SCR* and *SCR-like* genes as well as auxin  
437 response genes.

438

439 **Supplementary Data 4:** Transcript abundance of genes associated with cell division.

440

441 **Supplementary Data 5:** Transcript abundance of genes associated with chloroplast maturation  
442 and development.

443

444 **Supplementary Data 6:** Comparison of data derived from this study with genes identified by  
445 Kùlahoglu et al (2014).

446

447 **Supplementary Data 7:** Comparison of data derived from this study with genes identified by Aubry  
448 et al (2014).

449

450 **Supplementary Table 1:** Number of reads and transcripts, per stage and species.

451

452

453 **Acknowledgements**

454 Seeds for all *Flaveria* species used were kindly provided by Udo Gowik (Universität Düsseldorf).  
455 European Union *3to4* project and the Biotechnology and Biological Sciences Research Council  
456 (BBSRC) grant BB/J011754/1 funded the project.

457

458 **Author contributions**

459 BMCK and JMH designed the study. BMCK grew the plants, undertook the anatomical analysis  
460 and isolated the RNA; RS-U and CB undertook the *de novo* transcriptome assembly and  
461 annotation of contigs; BMCJ, SJB and IR-L analysed the RNA-seq data; BMCK, SJB and JMH  
462 wrote the paper.

## References

- Aubry S, Kelly S, Kümpers BMC, Smith-Unna RD, Hibberd JM.** 2014. Deep evolutionary comparison of gene expression identifies parallel recruitment of trans-factors in two independent origins of C4 photosynthesis. *PLoS Genetics* **10**, e1004365.
- Bauwe H, Hagemann M, Fernie AR.** 2010. Photorespiration: players, partners and origin. *Trends in Plant Science* **15**, 330–6.
- Bellasio C, Griffiths H.** 2014. The operation of two decarboxylases, transamination, and partitioning of C4 metabolic processes between mesophyll and bundle sheath cells allows light capture to be balanced for the maize C4 pathway. *Plant Physiology* **164**, 466–80.
- Bowes G, Ogren WL, Hageman RH.** 1971. Phosphoglycolate production catalyzed by ribulose diphosphate carboxylase. *Biochemical and Biophysical Research Communications* **45**, 716–722.
- Burgess SJ, Granero-Moya I, Grangé-Guermente MJ, Bournnell C, Terry MJ, Hibberd JM.** 2016. Ancestral light and chloroplast regulation form the foundations for C4 gene expression. *Nature Plants* **2**, 16161.
- Cai X, Dong F, Edelman RE, Makaroff CA.** 2003. The Arabidopsis SYN1 cohesin protein is required for sister chromatid arm cohesion and homologous chromosome pairing. *Journal of Cell Science* **116**, 2999–3007.
- Chelysheva L, Diallo S, Vezon D, et al.** 2005. AtREC8 and AtSCC3 are essential to the monopolar orientation of the kinetochores during meiosis. *Journal of Cell Science* **118**, 4621–32.
- Christin P-A, Osborne CP, Chatelet DS, Columbus JT, Besnard G, Hodkinson TR, Garrison LM, Vorontsova MS, Edwards EJ.** 2013. Anatomical enablers and the evolution of C4 photosynthesis in grasses. *Proceedings of the National Academy of Sciences, USA* **110**, 1381–6.
- Culligan KM, Hays JB.** 2000. Arabidopsis MutS homologs-AtMSH2, AtMSH3, AtMSH6, and a novel AtMSH7-form three distinct protein heterodimers with different specificities for mismatched DNA. *The Plant Cell* **12**, 991–1002.
- Drincovich M, Casati P, Andreo CS, Chessin S, Franceschi VR, Edwards GE, Ku MSB.** 1998. Evolution of C4 photosynthesis in Flaveria species: isoforms of NADP-malic enzyme. *Plant Physiology* **117**, 733–744.
- Edwards GE, Voznesenskaya E V.** 2011. C4 photosynthesis: Kranz forms and single-cell C4 in

terrestrial plants. In: Raghavendra A,, In: Sage RF, eds. C4 photosynthesis and related CO2 concentrating mechanisms. Advances in photosynthesis and respiration. Vol. 32. Dordrecht, The Netherlands: Springer, 29–61.

**Edwards GE, Walker D.** 1983. *C3, C4: mechanisms, and cellular and environmental regulation, of photosynthesis*. Oxford: Blackwell Scientific Publications.

**Furbank RT.** 2011. Evolution of the C4 photosynthetic mechanism: are there really three C4 acid decarboxylation types? *Journal of Experimental Botany* **62**, 3103–3108.

**Gilkerson J, Callis J.** 2014. A genetic screen for mutants defective in IAA1-LUC degradation in *Arabidopsis thaliana* reveals an important requirement for TOPOISOMERASE6B in auxin physiology. *Plant Signaling and Behavior* **9**, e972207.

**Gowik U, Bräutigam A, Weber KL, Weber APM, Westhoff P.** 2011. Evolution of C4 photosynthesis in the genus flaveria: how many and which genes does it take to make C4? *The Plant Cell* **23**, 2087–2105.

**Griffiths H, Weller G, Toy LFM, Dennis RJ.** 2013. You're so vein: Bundle sheath physiology, phylogeny and evolution in C3 and C4 plants. *Plant, Cell and Environment* **36**, 249–261.

**Haga N, Kobayashi K, Suzuki T, et al.** 2011. Mutations in MYB3R1 and MYB3R4 Cause Pleiotropic Developmental Defects and Preferential Down-Regulation of Multiple G2/M-Specific Genes in *Arabidopsis*. *Plant Physiology* **157**, 706–717.

**Külahoglu C, Denton AK, Sommer M, et al.** 2014. Comparative Transcriptome Atlases Reveal Altered Gene Expression Modules between Two Cleomaceae C3 and C4 Plant Species. *The Plant Cell* **26** 3243-32, 3243–32.

**Larkin RM, Stefano G, Ruckle ME, Stavoe AK, Sinkler CA, Brandizzi F, Malmstrom CM,**

**Osteryoung KW.** 2016. REDUCED CHLOROPLAST COVERAGE genes from *Arabidopsis thaliana* help to establish the size of the chloroplast compartment. *Proceedings of the National Academy of Sciences, USA* **113**, E1116-25.

**Li H, Chiu C-C.** 2010. Protein transport into chloroplasts. *Annual Review of Plant Biology* **61**, 157–180.

**Li P, Ponnala L, Gandotra N, et al.** 2010. The developmental dynamics of the maize leaf transcriptome. *Nature Genetics* **42**, 1060–7.

- Lyu M-JA, Gowik U, Kelly S, et al.** 2015. RNA-Seq based phylogeny recapitulates previous phylogeny of the genus *Flaveria* (Asteraceae) with some modifications. *BMC Evolutionary Biology* **15**, 116.
- Marcus AI, Li W, Ma H, Cyr RJ.** 2003. A Kinesin Mutant with an Atypical Bipolar Spindle Undergoes Normal Mitosis. *Molecular Biology of the Cell* **14**, 1717–1726.
- McKown AD, Dengler NG.** 2007. Key innovations in the evolution of Kranz anatomy and C4 vein pattern in *Flaveria* (Asteraceae). *American Journal of Botany* **94**, 382–399.
- McKown AD, Dengler NG.** 2009. Shifts in leaf vein density through accelerated vein formation in C4 *Flaveria* (Asteraceae). *Annals of Botany* **104**, 1085–1098.
- McKown AD, Moncalvo J-M, Dengler NG.** 2005. Phylogeny of *Flaveria* (Asteraceae) and inference of C4 photosynthesis evolution. *American Journal of Botany* **92**, 1911–28.
- Mitsui H, Nakatani K, Yamaguchi-Shinozaki K, Shinozaki K, Nishikawa K, Takahashi H.** 1994. Sequencing and characterization of the kinesin-related genes *katB* and *katC* of *Arabidopsis thaliana*. *Plant Molecular Biology* **25**, 865–876.
- Müller S, Smertenko A, Wagner V, Heinrich M, Hussey PJ, Hauser MT.** 2004. The plant microtubule-associated protein AtMAP65-3/PLE is essential for cytokinetic phragmoplast function. *Current Biology* **14**, 412–417.
- Nelissen H, Rymen B, Jikumaru Y, Demuyneck K, Van Lijsebettens M, Kamiya Y, Inzé D, Beeemster GTS.** 2012. A local maximum in gibberellin levels regulates maize leaf growth by spatial control of cell division. *Current Biology* **22**, 1183–1187.
- Pick TR, Bräutigam A, Schlüter U, et al.** 2011. Systems analysis of a maize leaf developmental gradient redefines the current C4 model and provides candidates for regulation. *The Plant Cell* **23**, 4208–20.
- Powell AM.** 1978. Systematics of *Flaveria* (Flaveriinae-Asteraceae). *Annals of the Missouri Botanical Garden* **65**, 590–636.
- Pyke KA.** 1997. The genetic control of plastid division in higher plants. *American Journal of Botany* **84**, 1017–1027.
- Pyke KA, Leech RM.** 1994. A Genetic Analysis of Chloroplast Division and Expansion in *Arabidopsis thaliana*. *Plant Physiology* **104**, 201–207.

- Sage RF, Christin PA, Edwards EJ.** 2011. The C<sub>4</sub> plant lineages of planet Earth. *Journal of Experimental Botany* **62**, 3155–3169.
- Schulze S, Mallmann J, Burscheidt J, Koczor M, Streubel M, Bauwe H, Gowik U, Westhoff P.** 2013. Evolution of C<sub>4</sub> photosynthesis in the genus *Flaveria*: establishment of a photorespiratory CO<sub>2</sub> pump. *The Plant Cell* **25**, 2522–35.
- Slewinski TL.** 2013. Using evolution as a guide to engineer Kranz-type C<sub>4</sub> photosynthesis. *Frontiers in Plant Science* **4**, 1–13.
- Slewinski TL, Anderson AA, Zhang C, Turgeon R.** 2012. Scarecrow plays a role in establishing Kranz anatomy in maize leaves. *Plant & Cell Physiology* **53**, 2030–7.
- Smith-Unna R, Bournnell C, Patro R, Hibberd JM, Kelly S.** 2016. TransRate: Reference-free quality assessment of de novo transcriptome assemblies. *Genome Research* **26**, 1134–1144.
- Swiatecka-Hagenbruch M, Emanuel C, Hedtke B, Liere K, Börner T.** 2008. Impaired function of the phage-type RNA polymerase RpoTp in transcription of chloroplast genes is compensated by a second phage-type RNA polymerase. *Nucleic Acids Research* **36**, 785–792.
- Torabi S, Umate P, Manavski N, Plochinger M, Kleinknecht L, Bogireddi H, Herrmann RG, Wanner G, Schroder WP, Meurer J.** 2014. PsbN Is Required for Assembly of the Photosystem II Reaction Center in *Nicotiana tabacum*. *The Plant Cell* **26**, 1183–1199.
- Tuteja N, Tran NQ, Dang HQ, Tuteja R.** 2011. Plant MCM proteins: role in DNA replication and beyond. *Plant Molecular Biology* **77**, 537–545.
- Vlieghe K, Boudolf V, Beemster GTS, Maes S, Magyar Z, Atanassova A, de Almeida Engler J, De Groodt R, Inzé D, De Veylder L.** 2005. The DP-E2F-like Gene DEL1 Controls the Endocycle in *Arabidopsis thaliana*. *Current Biology* **15**, 59–63.
- Wang Y, Bräutigam A, Weber APM, Zhu X-G.** 2014. Three distinct biochemical subtypes of C<sub>4</sub> photosynthesis? A modelling analysis. *Journal of Experimental Botany* **65**, 3567–78.
- Whittington AT, Vugrek O, Wei KJ, Hasenbein NG, Sugimoto K, Rashbrooke MC, Wasteneys GO.** 2001. MOR1 is essential for organizing cortical microtubules in plants. *Nature* **411**, 610–613.
- Williams BP, Johnston IG, Covshoff S, Hibberd JM.** 2013. Phenotypic landscape inference reveals multiple evolutionary paths to C<sub>4</sub> photosynthesis. *eLife* **2**, e00961.
- Yoshiyama K, Conklin PA, Huefner ND, Britt AB.** 2009. Suppressor of gamma response 1

(SOG1) encodes a putative transcription factor governing multiple responses to DNA damage.

*Proceedings of the National Academy of Sciences, USA* **106**, 12843–8.

**Zghidi W, Merendino L, Cottet A, Mache R, Lerbs-Mache S.** 2007. Nucleus-encoded plastid sigma factor SIG3 transcribes specifically the psbN gene in plastids. *Nucleic Acids Research* **35**, 455–464.



## Figure Legends

**Figure 1: Characteristics of mature leaves from C<sub>3</sub> and C<sub>4</sub> species of *Flaveria*.** **A:** Representative outlines of mature leaves showing the variation between species and the dentate nature of the two C<sub>4</sub> species. **B:** Vein traces taken in the middle of the leaf to the right of the mid-vein indicating denser venation in mature leaves of both C<sub>4</sub> species. **C:** Transverse sections showing the reduced mesophyll cross-sectional area and the closer veins with more symmetric bundle sheaths in the C<sub>4</sub> compared with the C<sub>3</sub> species. Each cell-type is false coloured-coded: veins (red), bundle sheath (dark green), spongy mesophyll (light green), palisade mesophyll (turquoise), parenchyma layer with no or few chloroplasts (blue) and epidermis (lilac). Species abbreviations are as follows: *Flaveria pringlei* (Fp), *Flaveria robusta* (Fr), *Flaveria bidentis* (Fb), *Flaveria trinervia*, (Ft). Scale bars represent 1cm (**A**) or 100µm (**B-C**).

**Figure 2: Within leaf sampling indicates the gradual maturation gradient in leaf anatomy for C<sub>3</sub> and C<sub>4</sub> *Flaveria* species.** **A:** Representative leaf outline illustrating leaf sampling. Representative transverse sections from C<sub>3</sub> *Flaveria pringlei* (**B**) and C<sub>4</sub> *Flaveria bidentis* (**C**) from base (bottom) to tip (top). Note the gradual expansion of cells, increased vacuolisation and clearer delineation of both mesophyll and bundle sheath cells from base to tip. Scale bars represent 100µm.

**Figure 3: Transcripts encoding the C<sub>4</sub> cycle increase dramatically during leaf maturation of the C<sub>4</sub> species.** The schematic of major components of the C<sub>4</sub> pathway located in mesophyll and bundle sheath cells of C<sub>4</sub> leaves is surrounded by plots of transcript abundance for key genes of the NADP-ME sub-type in transcripts per million (TPM) for the four species. *RBCS1A* transcripts are, as expected higher in the C<sub>3</sub> species. All C<sub>4</sub> transcripts other than *CARBONIC ANHYDRASE1* (*CA1*) are barely detectable in the C<sub>3</sub> species. *PEPC1* = *PHOSPHOENOLPYRUVATE CARBOXYLASE 1*, *NADP-MDH* = *NADP-DEPENDENT MALATE DEHYDROGENASE*, *NADP-ME1* = *NADP-DEPENDENT MALIC ENZYME1*, *PPDK* = *PYRUVATE, ORTHOPHOSPHATE DIKINASE*, *PPDK-RP1* = *PYRUVATE, ORTHOPHOSPHATE DIKINASE REGULATORY PROTEIN*, *NHD1* = *SODIUM:HYDROGEN ANTIporter*, *BASS2* = *BILE ACID SODIUM SYMPORTER FAMILY2*. The two C<sub>4</sub> species are shown with solid lines, and the two C<sub>3</sub> species with dashed lines.

**Figure 4: Overview of the global changes in gene expression along the C<sub>3</sub> and C<sub>4</sub> *Flaveria* maturation gradients.** **A.** RNA-seq was conducted on six regions of *Flaveria* leaves. The numbers of differentially expressed genes in each section of the leaf are depicted to the left (up in both C<sub>3</sub> *F. pringlei* and *F. robusta*) and to the right (up in both C<sub>4</sub> *F. bidentis* and *F. trinervia*) of the leaf schematic. **B.** Principal Components Analysis of the differentially expressed genes in all four

species shows that the first dimension is associated with leaf maturation, but the second dimension is associated with photosynthetic pathway. C<sub>3</sub> species are depicted in red, C<sub>4</sub> species in blue, and each stage is numbered from 1 (base) to 6 (tip). **C.** Summary of MapMan categories associated with the top decile of differentially expressed genes in each species. *Fp* = *Flaveria pringlei*, *Fr* = *Flaveria robusta*, *Fb* = *Flaveria bidentis* and *Ft* = *Flaveria trinervia*.

**Figure 5: Vein density increases dramatically between the upper base and lower mid leaf sections of the C<sub>4</sub> species compared with the C<sub>3</sub> species.** Representative vein traces from base to tip of all four species illustrating the maturation of vein density. *Fp* = *Flaveria pringlei*, *Fr* = *F. robusta*, *Fb* = *Flaveria bidentis* and *Ft* = *Flaveria trinervia*. The leaf outline in the centre indicates that vein density measurements were obtained from the centre of each section to the right of the midrib. **B.** Quantitation of vein density in each section for the four species. In all species, vein density was highest in the middle and decreased towards the tip of leaves. A rapid increase in vein density occurs between the upper base and lower mid in both C<sub>4</sub> species. Error bars represent one standard error of the mean. Scale bars represent 100µm for the vein traces and 0.5cm for the leaf outline.

**Figure 6: Patterns of transcript abundance in the four *Flaveria* species for genes known to be involved in vein formation.** Transcript abundance is shown in transcripts per million (TPM), and the parts of the leaf are annotated on the x-axis. The two C<sub>4</sub> species are shown with solid lines, and the two C<sub>3</sub> species with dashed lines. *Fp* = *Flaveria pringlei*, *Fr* = *Flaveria robusta*, *Fb* = *Flaveria bidentis* and *Ft* = *Flaveria trinervia*.

**Figure 7: During leaf maturation mesophyll cell expansion is reduced in the C<sub>4</sub> compared with the C<sub>3</sub> species.** **A.** Representative leaf outline illustrating leaf sampling. **B-E.** Representative transverse sections from base to tip of leaves from C<sub>3</sub> *F. pringlei* (**B**) and *F. robusta* (**C**), as well as *F. bidentis* (**D**) and *F. trinervia* (**E**). **F&G.** Quantification of cross-sectional cell areas for mesophyll (**F**) and bundle sheath (**G**) cells along leaf maturation gradient. Each cell is false coloured-coded: veins (red), bundle sheath (dark green), spongy mesophyll (light green), palisade mesophyll (turquoise), parenchyma layer with no or few chloroplasts (blue) and epidermis (lilac). Species abbreviations are as follows: *Flaveria pringlei* (*Fp*), *Flaveria robusta* (*Fr*), *Flaveria bidentis* (*Fb*), *Flaveria trinervia*, (*Ft*). Scale bars (**B-E**) represent 100µm.

**Figure 8: Chloroplast ultrastructure from mesophyll and bundle sheath cells from C<sub>3</sub> *F. pringlei* and C<sub>4</sub> *F. bidentis*.** Transmission electron microscopy was used to investigate chloroplast ultrastructure. **A&B,** Bundle sheath chloroplasts from C<sub>3</sub> *Flaveria pringlei* and C<sub>4</sub> *Flaveria bidentis*. **C&D,** Mesophyll chloroplasts from C<sub>3</sub> *F. pringlei* and C<sub>4</sub> *F. bidentis*. Little granal stacking was seen in bundle sheath chloroplasts from *F. bidentis* (**B**) whereas it could be observed in C<sub>3</sub> bundle

sheath and in all mesophyll chloroplasts. Insets show close-up of thylakoids with white arrowheads indicating thylakoid stacks (**A**, **C**, **D**) or the lack of extensive stacking (**B**). Scale bars represent 500nm.

**Figure 9: Quantitation of chloroplast length and width from mesophyll and bundle sheath cells.** Length and width were taken from thin sections used in transmission electron microscopy. For each species five chloroplasts were measured per stage and cell type. Error bars represent one standard error of the mean. The two C<sub>4</sub> species are shown with solid lines, and the two C<sub>3</sub> species with dashed lines.

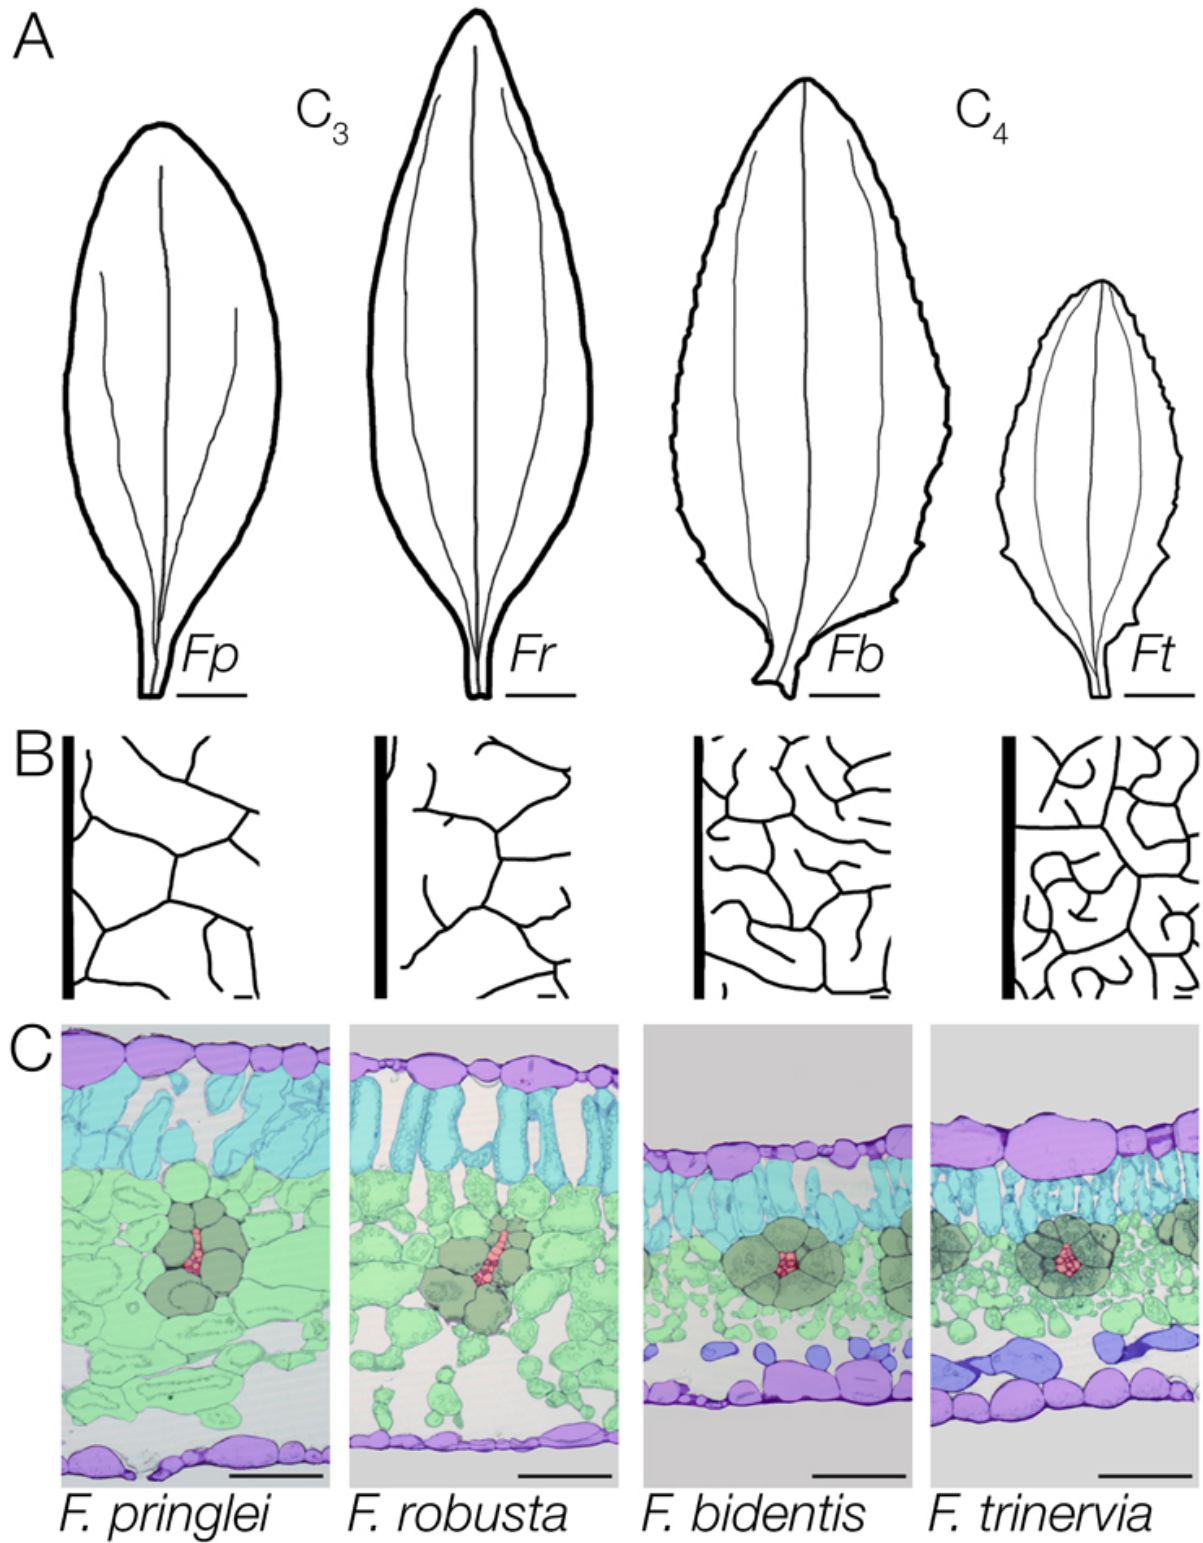

**Figure 1**

**A**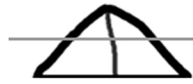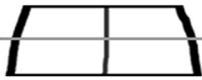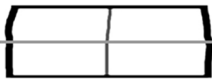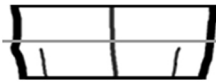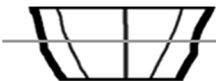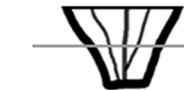**B***F. pringlei* (C<sub>3</sub>)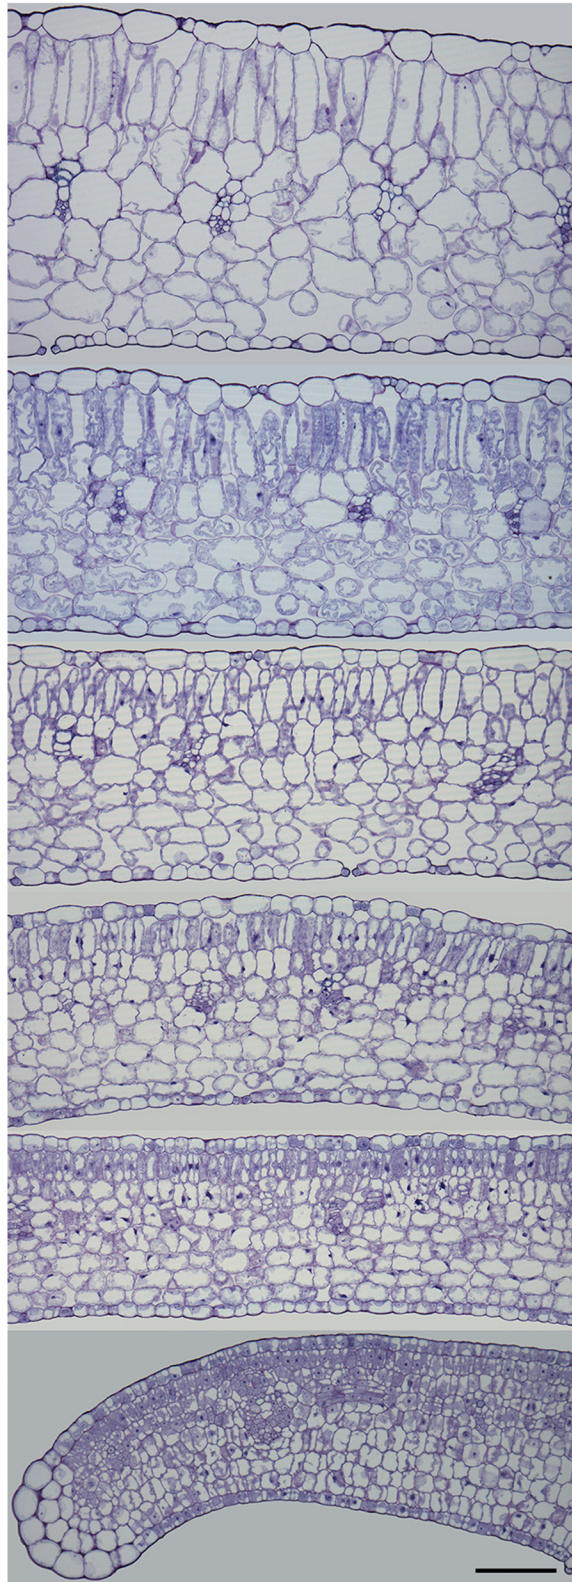**C***F. bidentis* (C<sub>4</sub>)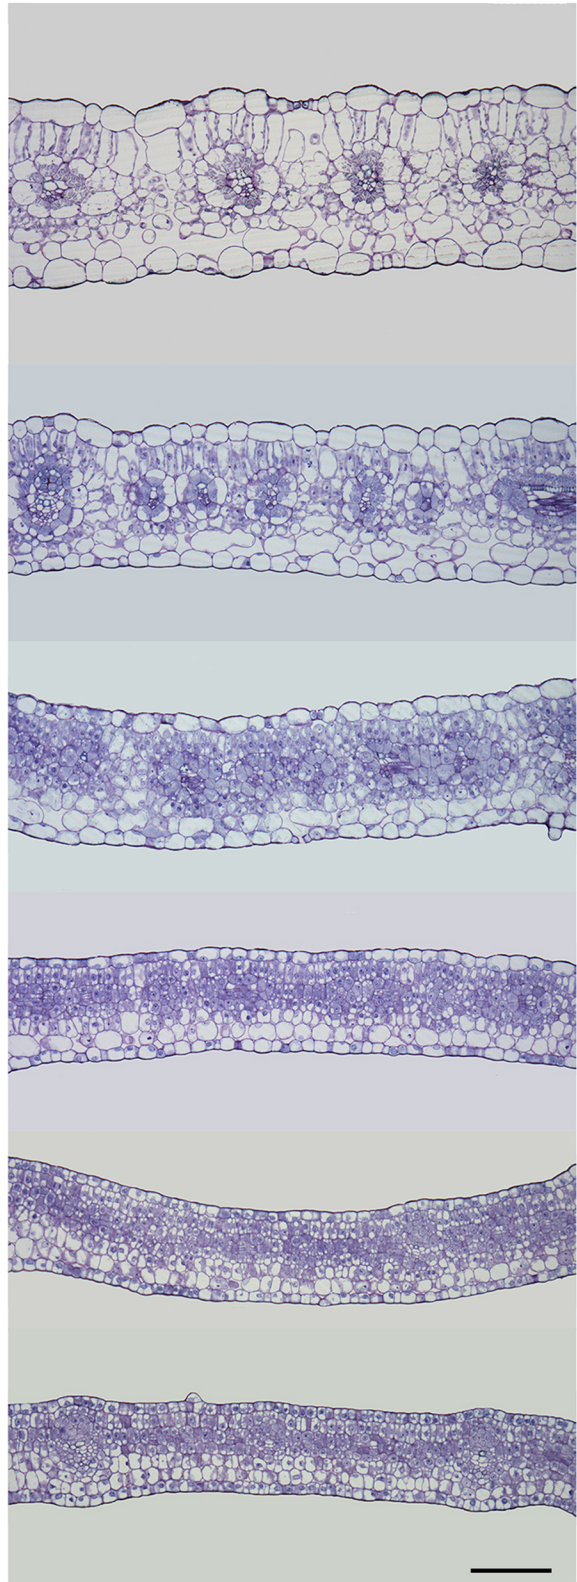**Figure 2**

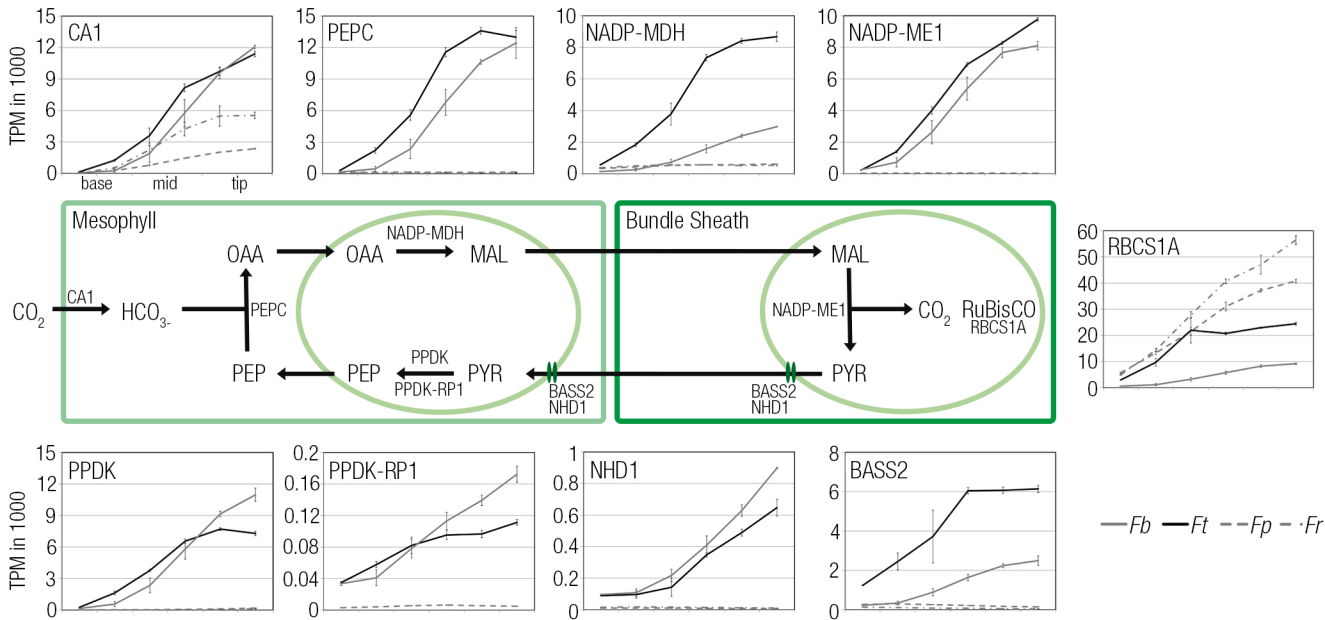

**Figure 3**

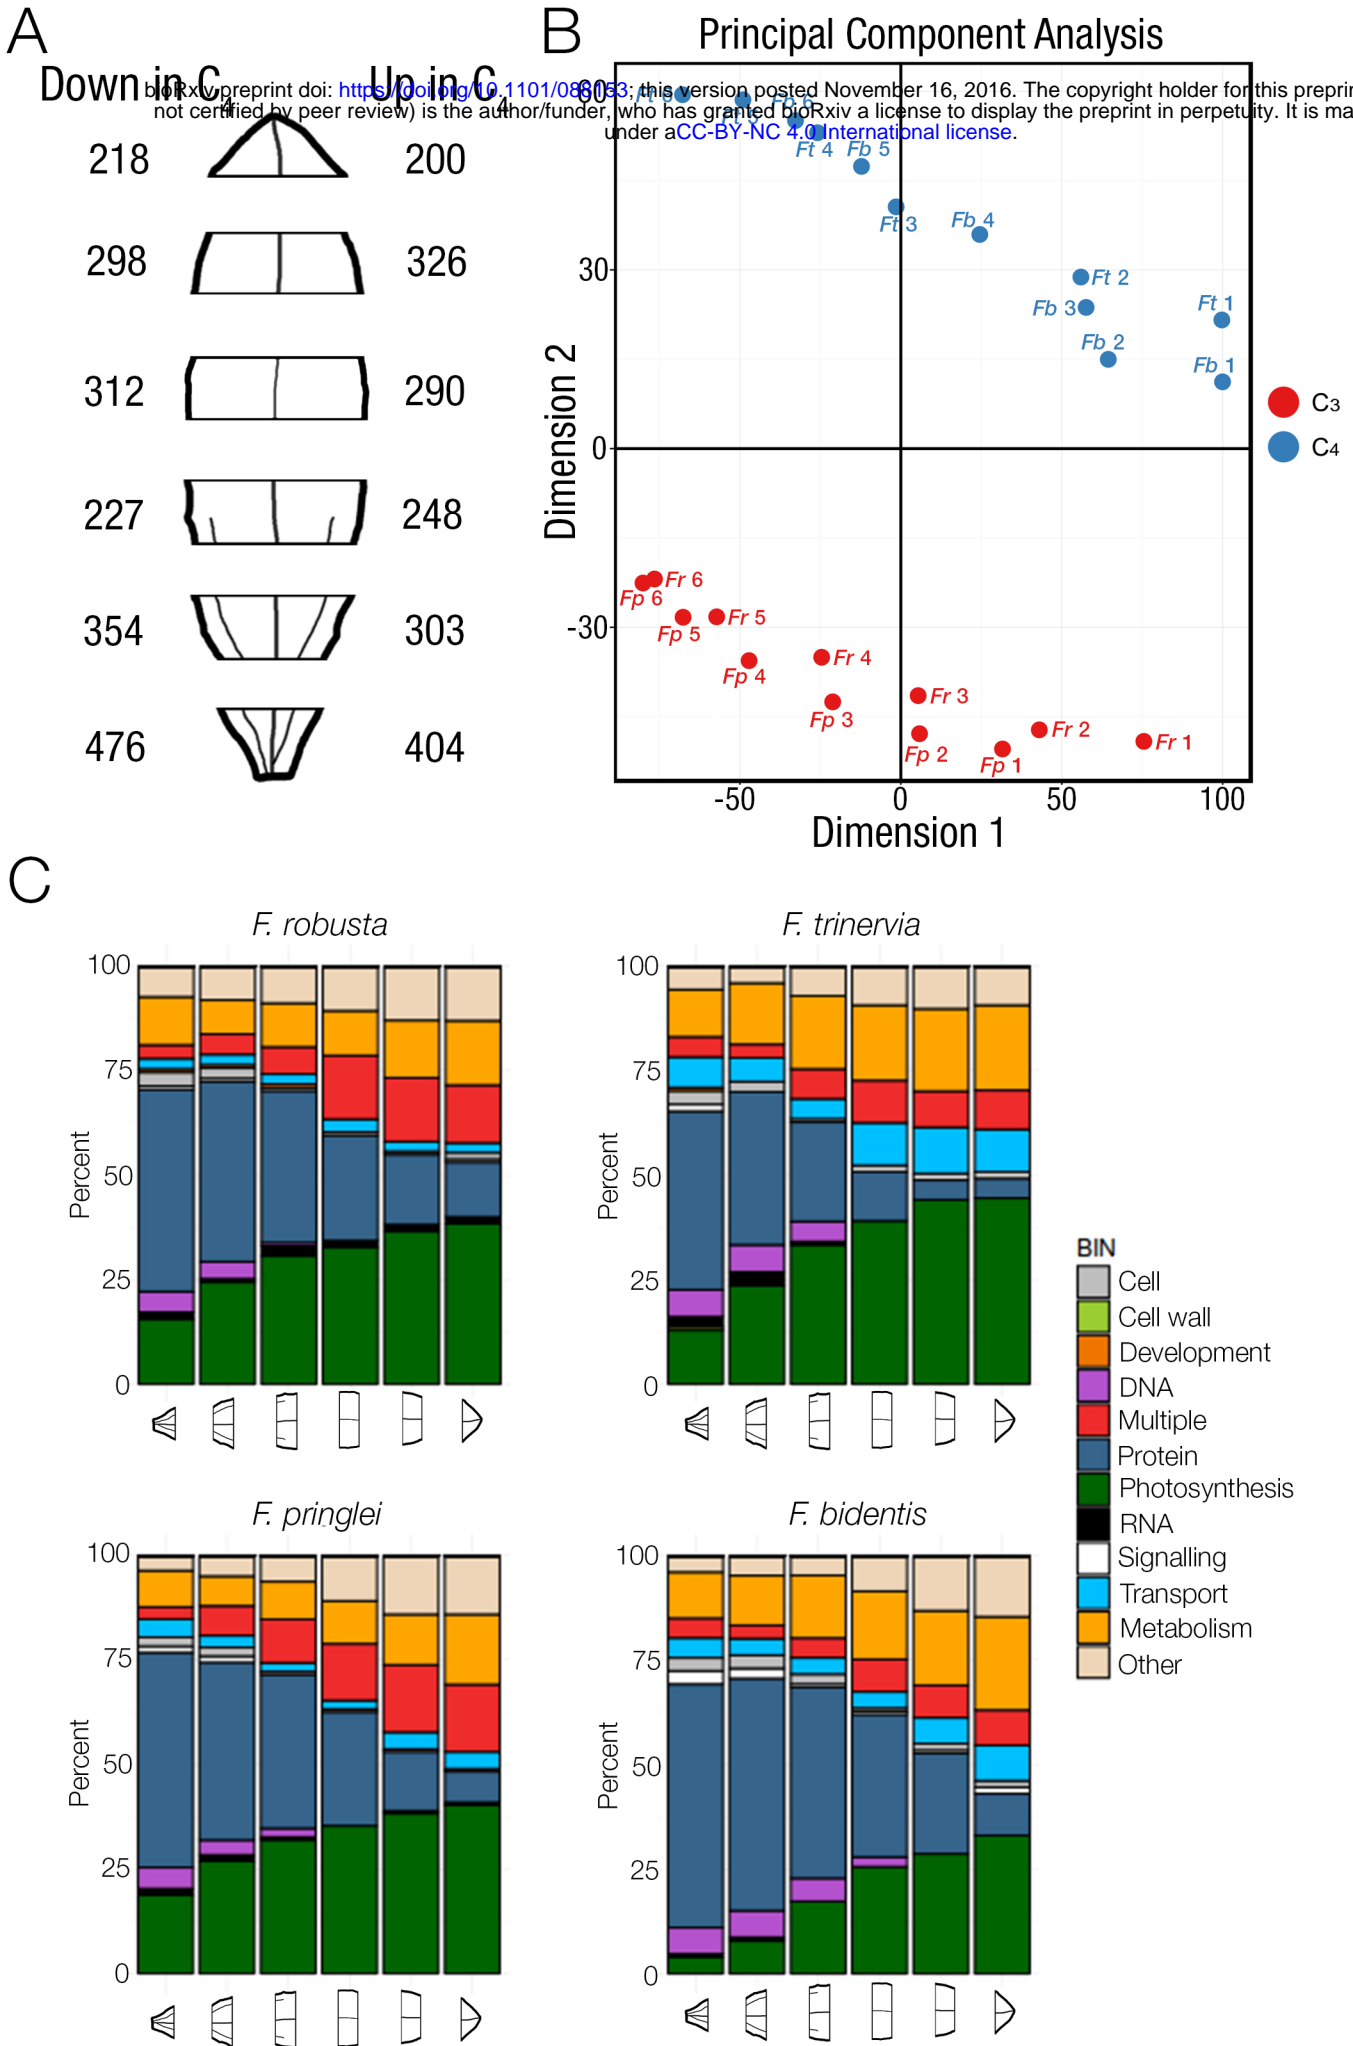

Figure 4

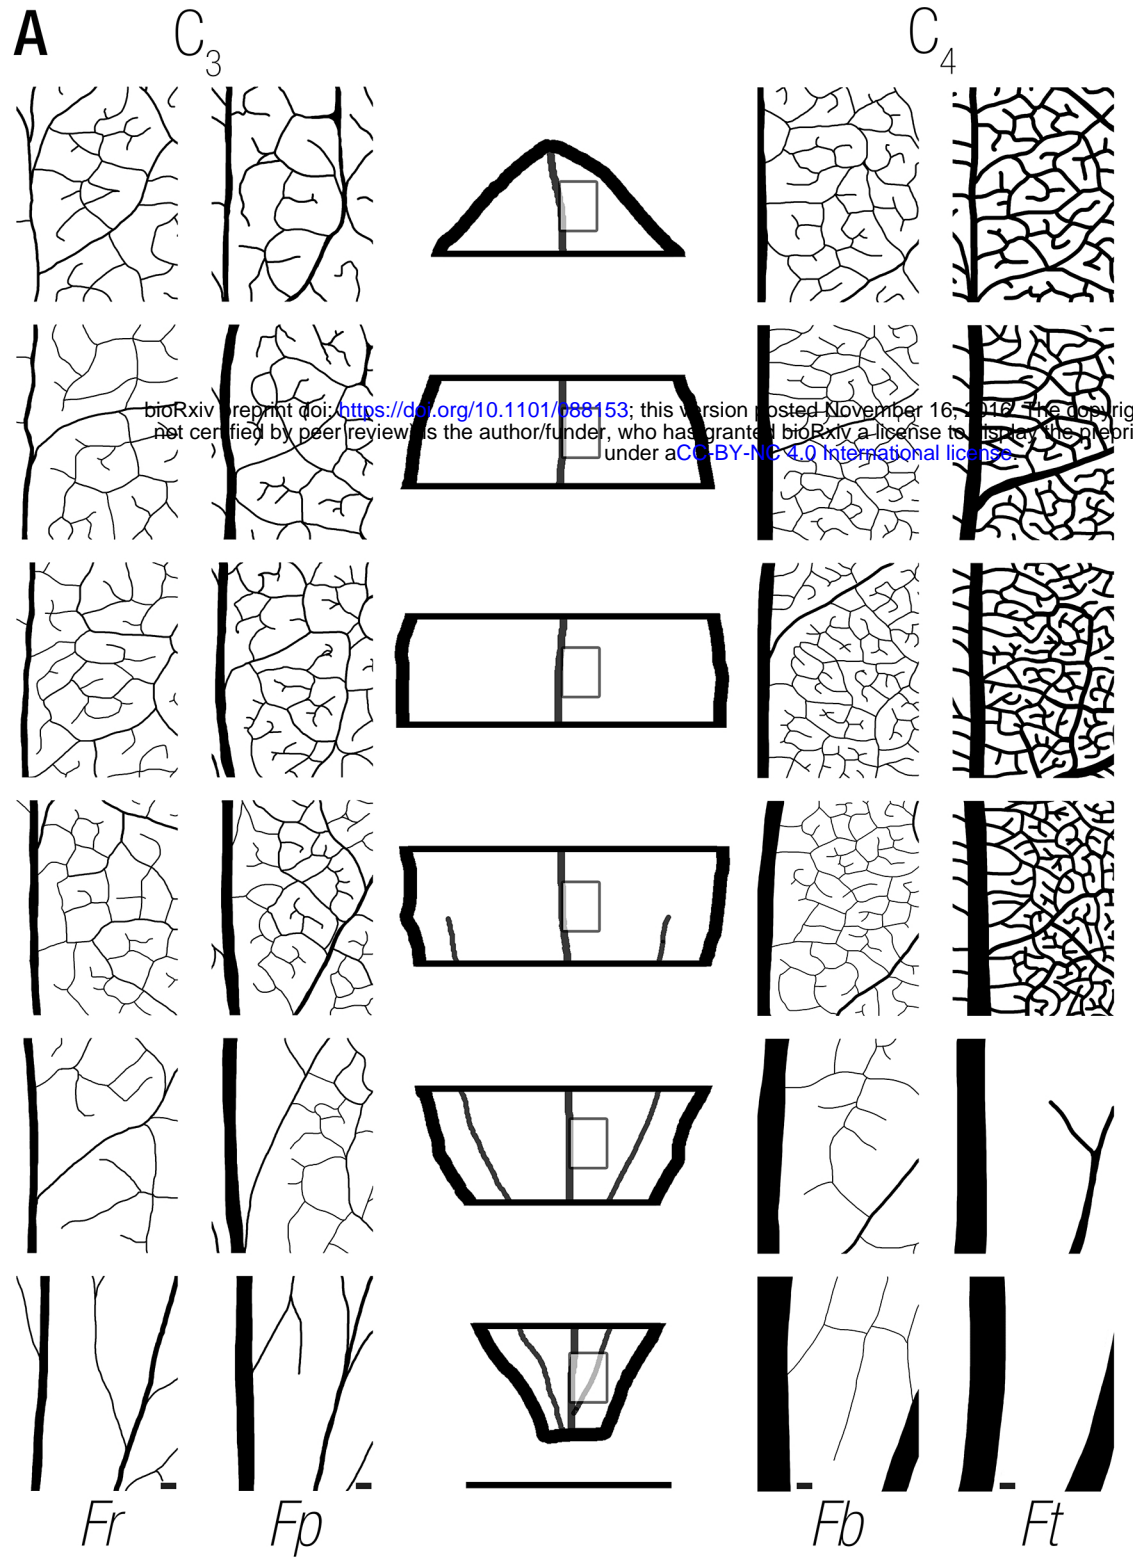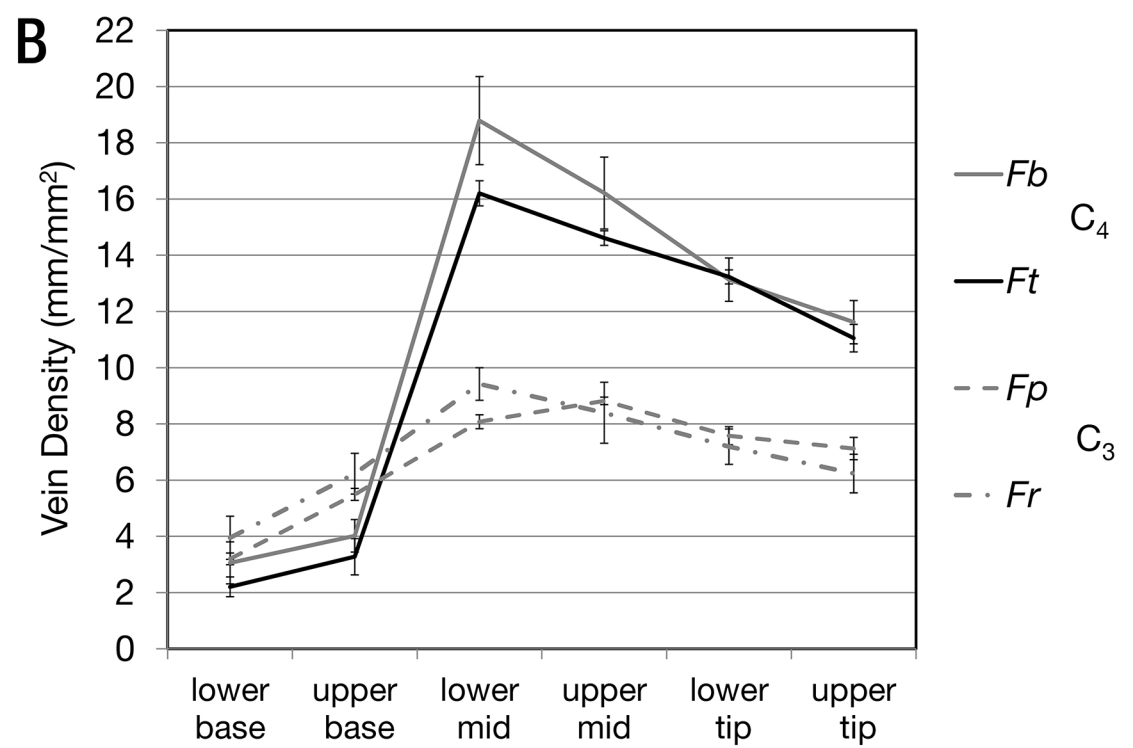

**Figure 5**



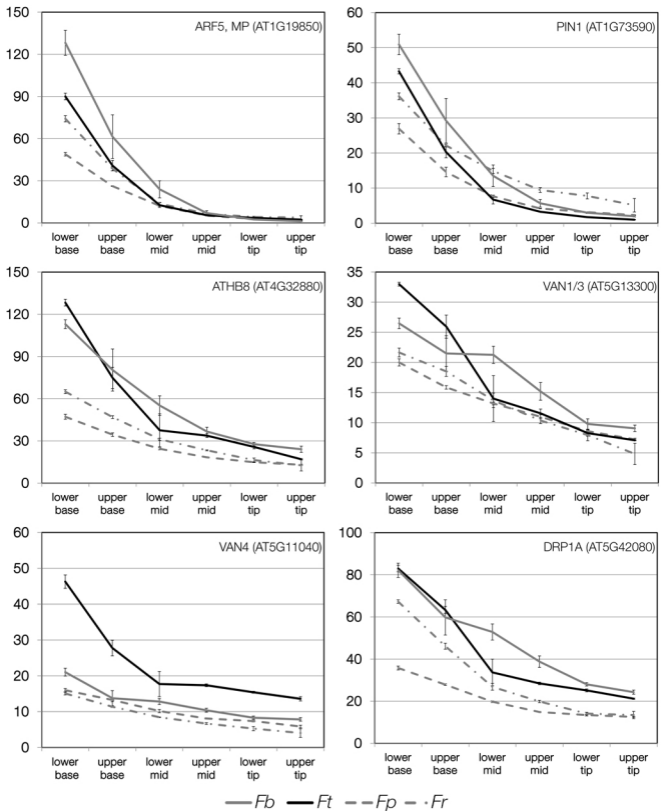

Figure 6

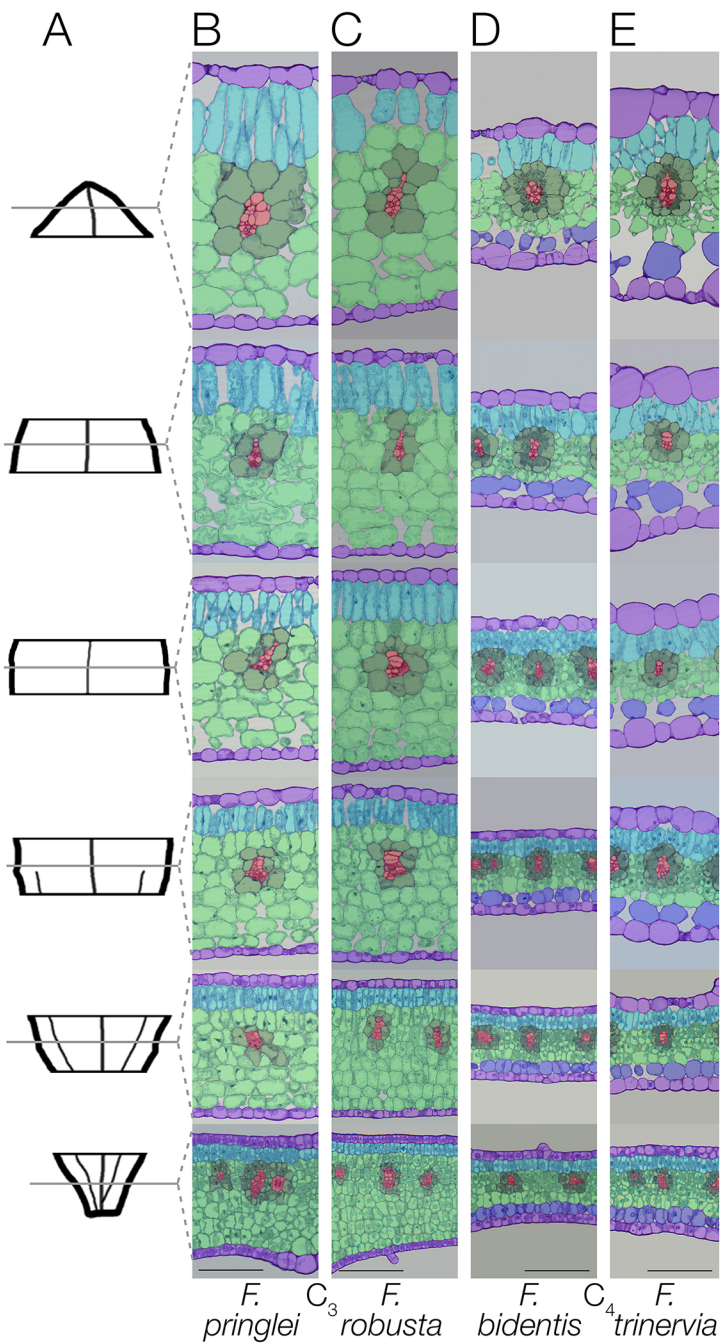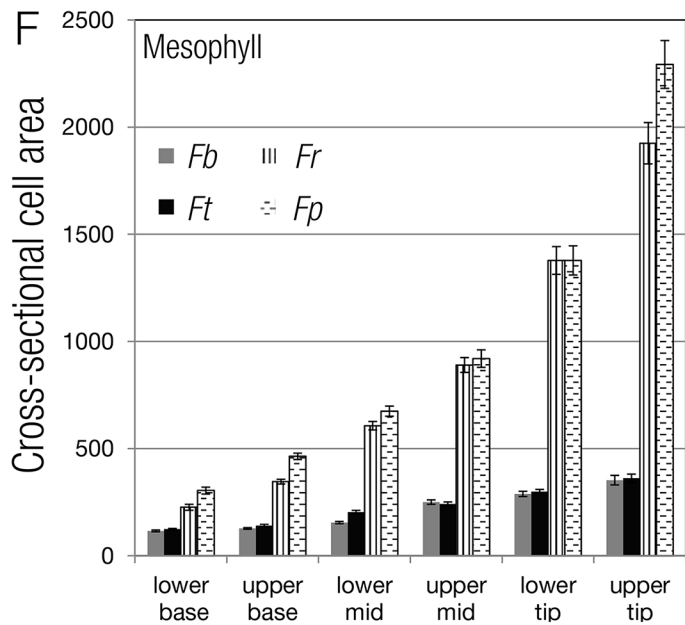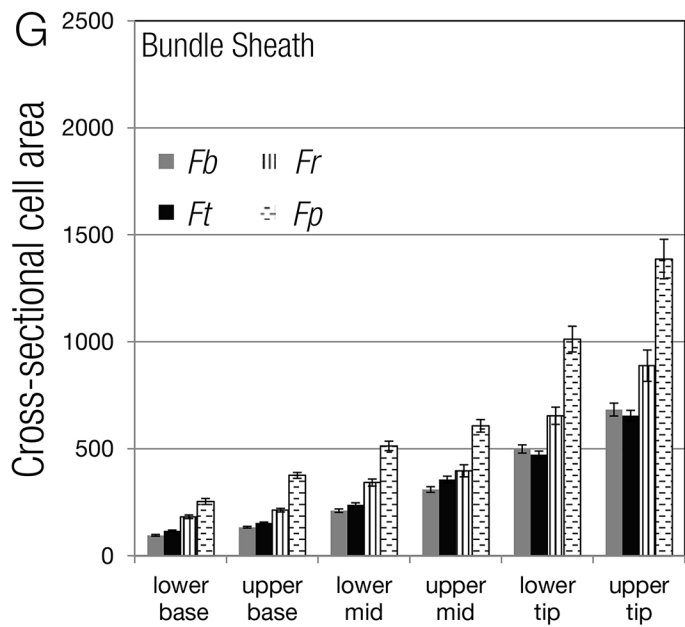

**Figure 7**

$C_3$  $C_4$ 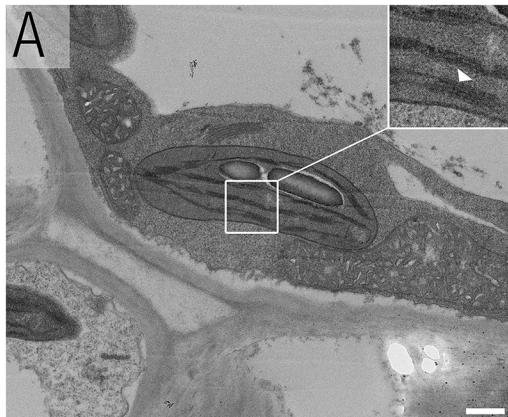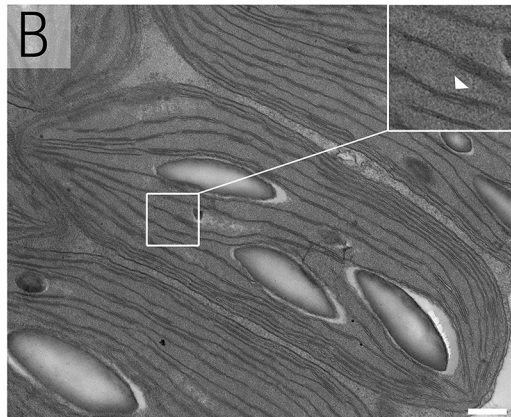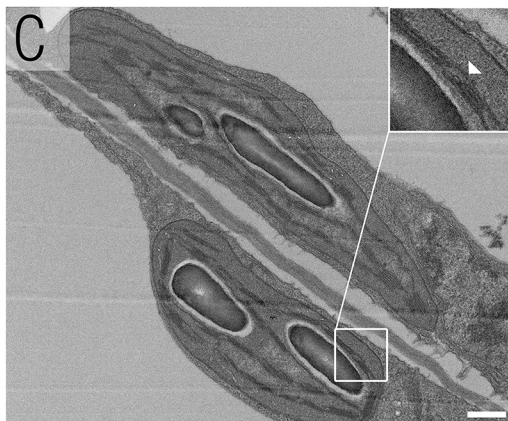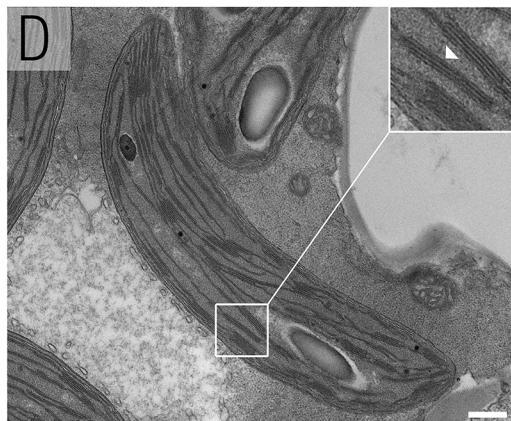

Figure 8

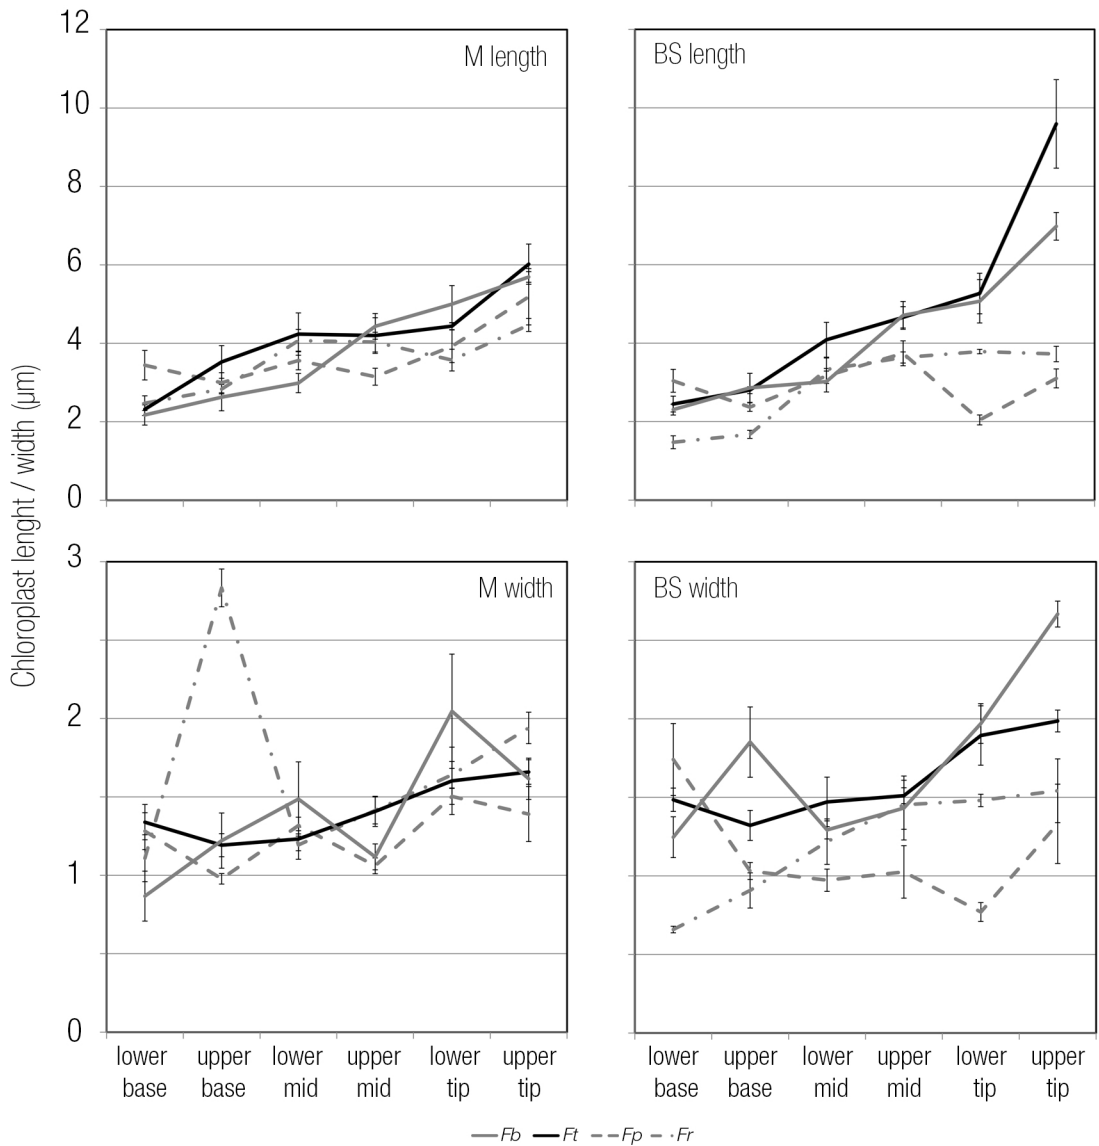

**Figure 9**
